1 **Rapid decay of host basal mRNAs during SARS-CoV-2 infection perturbs**  
2 **host antiviral mRNA biogenesis and export**

3

4

5 James M. Burke<sup>1</sup>, Laura A. St Clair<sup>4,5</sup>, Rushika Perera<sup>4,5</sup>, Roy Parker<sup>1,2,3,\*</sup>

6

7

8 1. Department of Biochemistry, University of Colorado Boulder, Boulder, Colorado, 80303

9 2. Howard Hughes Medical Institute, University of Colorado Boulder, Boulder, Colorado, 80303

10 3. BioFrontiers Institute, University of Colorado Boulder, Boulder, Colorado, 80303

11 4. Center for Vector-Borne and Infectious Diseases, Department of Microbiology, Immunology and  
12 Pathology, Colorado State University, Fort Collins, CO 80523, USA.

13 5. Center for Metabolism of Infectious Diseases, Colorado State University, Fort Collins, CO 80523,  
14 USA

15

16

17 \*Correspondence: [Roy.Parker@Colorado.edu](mailto:Roy.Parker@Colorado.edu)

18 **Abstract**

19

20 A key feature of the mammalian innate immune response to viral infection is the transcriptional  
21 induction of interferon (IFN) genes, which encode for secreted proteins that prime the antiviral response  
22 and limit viral replication and dissemination. A hallmark of severe COVID-19 disease caused by SARS-  
23 CoV-2 is the low presence of IFN proteins in patient serum despite elevated levels of *IFN*-encoding  
24 mRNAs, indicative of post-transcriptional inhibition of IFN protein production. Herein, we show SARS-  
25 CoV-2 infection limits type I and type III IFN biogenesis by preventing the release of mRNA from their  
26 sites of transcription and/or triggering their nuclear degradation. In addition, SARS-CoV-2 infection  
27 inhibits nuclear-cytoplasmic transport of *IFN* mRNAs as a consequence of widespread cytosolic mRNA  
28 degradation mediated by both activation of the host antiviral endoribonuclease, RNase L, and by the SARS-  
29 CoV-2 protein, Nsp1. These findings argue that inhibition of host and/or viral Nsp1-mediated mRNA decay,  
30 as well as IFN treatments, may reduce viral-associated pathogenesis by promoting the innate immune  
31 response.

## 32 Introduction

33

34 The severe acute respiratory syndrome coronavirus 2 (SARS-CoV-2) is the cause of the COVID-  
35 19 pandemic. Since SARS-CoV-2 will remain endemic in human populations (Lavine et al., 2021),  
36 development of COVID-19 treatments is paramount. Several clinical trials are currently underway that  
37 modulate the innate immune response to treat COVID-19, including treatment with interferon (IFN)  
38 proteins (NCT04350671; NCT04388709; CT04647695; NCT04552379). However, the innate immune  
39 response to SARS-CoV-2 infection is not well-understood.

40

41 During the innate immune response to viral infection, the detection of viral double-stranded RNA  
42 (dsRNA) by host cells results in the transcriptional induction of mRNAs encoding for cytokines, including  
43 type I and type III IFNs, which are exported to the cytoplasm where they are translated (Jensen and  
44 Thomsen, 2012; Ivashkiv and Donlin, 2014; Lazear et al., 2019). These proteins are secreted from infected  
45 cells and prime an antiviral state in both infected and non-infected cells via autocrine and paracrine  
46 signaling. This limits viral replication capacity and promotes the function of innate and adaptive immune  
47 cells at sites of infection, which reduces viral loads and limits viral dissemination to secondary sites of  
48 infection.

49

50 Despite the potent antiviral activities of IFNs, it is currently controversial whether IFNs promote  
51 COVID-19 disease via their pro-inflammatory functions, or whether the low production of IFNs in response  
52 to SARS-CoV-2 contributes to COVID-19 disease progression. In support of the former, *IFN*-encoding  
53 mRNAs are elevated in patients with severe COVID-19 symptoms (Lee et al., 2020; Wilk et al., 2020; Zhou  
54 et al., 2020). In support of the latter, IFN proteins are relatively low in patients with severe COVID-19  
55 symptoms (Blanco-Melo, et al., 2020; Hadjadj et al., 2020). While seemingly contradictory, these findings  
56 are nonetheless consistent with observations that SARS-CoV-2 induces transcription of IFNs, but  
57 antagonizes IFN protein production (Lei et al., 2020; Li et al., 2020). How IFNs are post-transcriptionally  
58 inhibited during SARS-CoV-2 infection is unknown.

59

60 Recently, we demonstrated that activation of the host antiviral endoribonuclease RNase L results  
61 in widespread degradation of mRNA (Burke et al., 2019), which in turn inhibits the nuclear export of *IFN*  
62 mRNAs, limiting IFN protein production (Burke et al., 2021). Herein, we analyze SARS-CoV-2 replication  
63 and its effect on host cells at the single-cell and single-molecule level. We show that SARS-CoV-2 infection  
64 similarly leads to rapid decay of host basal mRNAs triggering the inhibition of the nuclear export of *IFN*  
65 mRNAs. Unexpectedly, these phenomena can occur independently of RNase L activation via mRNA  
66 degradation mediated by the SARS-CoV-2-encoded Nsp1 protein. We also observe that SARS-CoV-2  
67 infection limits the biogenesis of IFN mRNAs by reducing their release from their sites of transcription  
68 and/or triggering their nuclear degradation. These findings have implications for transcriptomic analyses of  
69 SARS-CoV-2 infection, current IFN drug trials, and the development of drugs to inhibit SARS-CoV-2-  
70 Nsp1-mediated mRNA decay.

71 **Results**

72

73 **Generation of single-molecule SARS-CoV-2 mRNA visualization**

74

75 To test the hypothesis that RNase L-mediated inhibition of mRNA export inhibits IFN protein  
76 production in response to SARS-CoV-2, we first transduced parental (WT) and RNase L knockout (RL-  
77 KO) A549 lung carcinoma cell lines with an ACE2-encoding lentivirus to make them permissive to SARS-  
78 CoV-2 infection (Burke et al., 2019) (Fig. S1A). We confirmed several RNase L-dependent phenotypes in  
79 response to poly(I:C) lipofection in WT<sup>ACE2</sup> but not RL-KO<sup>ACE2</sup> cells (Burke et al., 2019; Burke et al., 2020,  
80 Burke et al., 2021), including degradation of *GAPDH* mRNA, the generation of small stress granule-like  
81 foci (RLBs), inhibition of stress granule assembly, PABP translocation to the nucleus, and nuclear retention  
82 of *IFNB* mRNA (Fig. S1B,C). This demonstrates that these A549 cells expressing the ACE2 receptor have  
83 a normal innate immune response to dsRNA.

84

85 To identify SARS-CoV-2-infected cells, we generated single-molecule in situ hybridization  
86 (smFISH) probe sets that target the ORF1a, ORF1b, or N regions of the SARS-CoV-2 genomic mRNA  
87 (Fig. 1A). The ORF1a and ORF1b probes would be expected to detect the full-length (FL) genome, whereas  
88 the N probes would detect both the FL-genome and sub-genomic (SG) mRNAs (Fig. 1A).

89

90 We co-stained A549-WT<sup>ACE2</sup> cells at multiple times post-infection with ORF1a and N smFISH  
91 probes. By four hours post-infection, we observed small and dispersed foci (~100 copies/cell) that co-  
92 stained for ORF1a and N RNA, which we suggest are individual SARS-CoV-2 genomes/full-length  
93 mRNAs (Fig. 1B and Fig. S2A). In addition, we observed larger structures that contain multiple genomes,  
94 which are likely replication factories (RFs) and/or concentrated sites of translation or mRNA processing.  
95 At eight hours post-infection, SARS-CoV-2 genome copies increased ~10-fold (to ~1000 copies/cell) and  
96 sub-genomic RNAs became abundant throughout the cell (Fig. 1B and Fig. S2B). From twelve through  
97 forty-eight hours post-infection, large RFs concentrated with full-length genome (fluorescent intensity was  
98 generally saturating) localized to the perinuclear region of the cell (Fig. 1B). At these later times, sub-  
99 genomic RNAs (N probes) were more abundant, as these N-positive RNAs only partially localized to the  
100 RFs and were mostly dispersed throughout the cytoplasm (Fig. 1B and Fig. S2B).



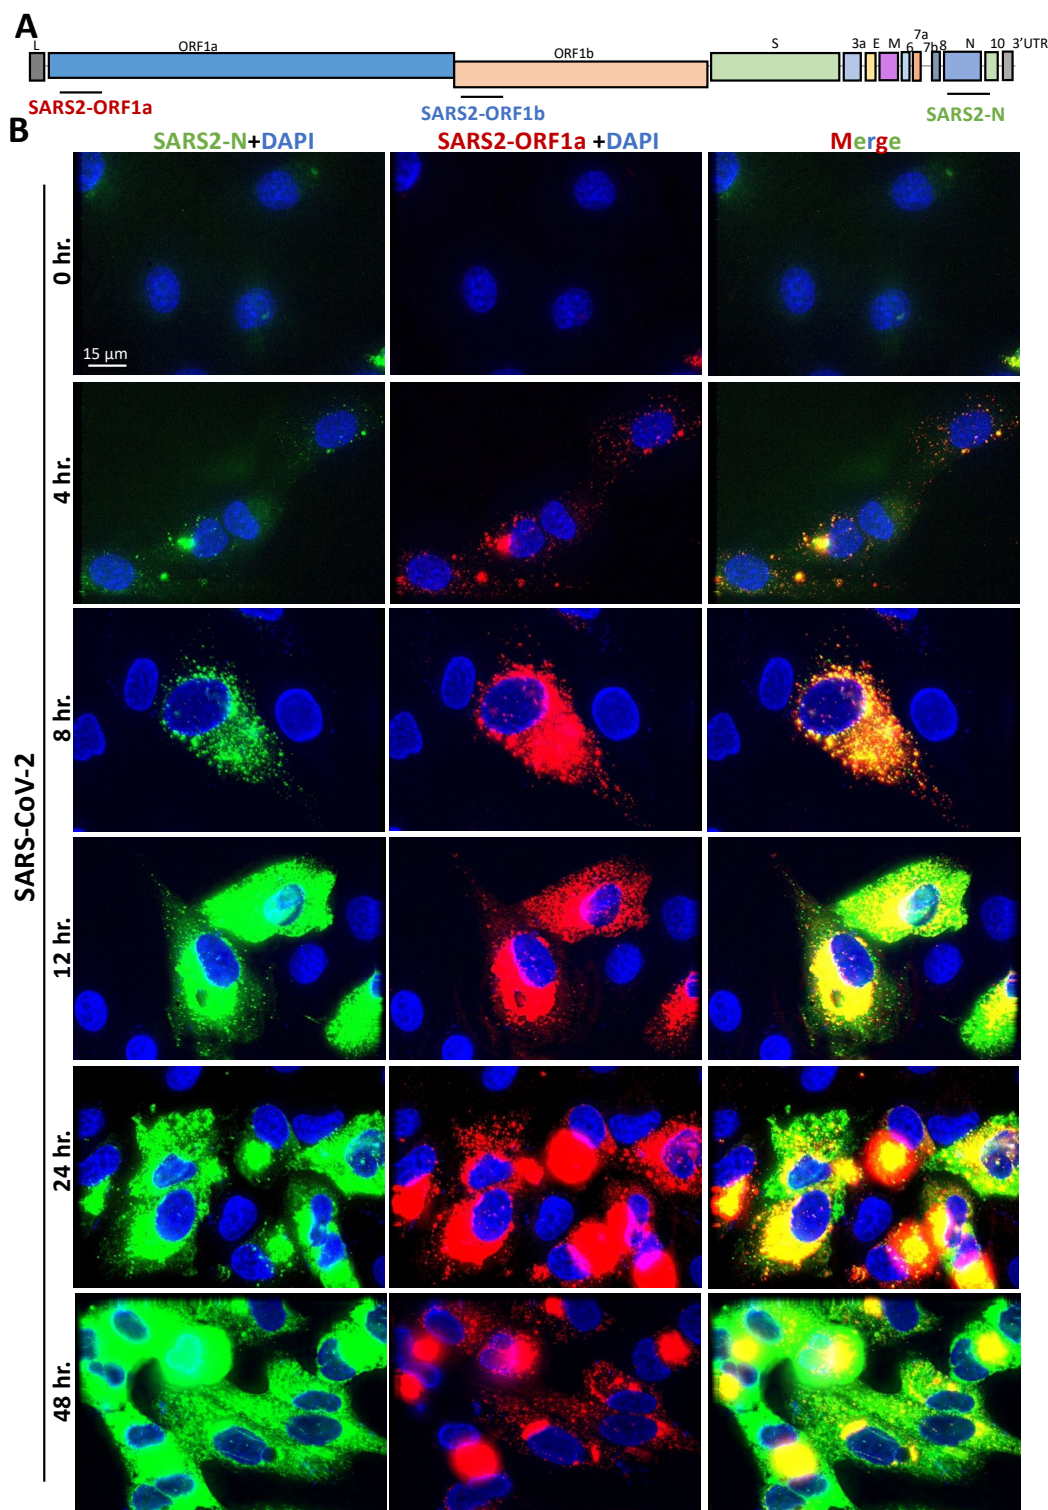

101  
102  
103  
104  
105  
106

**Fig. 1. Single-molecule analysis of SARS-CoV-2 genomic and sub-genomic RNAs.**

(A) Schematic to show the location of smFISH probe sets targeting the different regions of SARS-CoV-2 mRNA. The ORF1a and ORF1b target the full-length genome, whereas the S and N probe sets target both the full-length genome and various sub-genomic RNAs. (B) smFISH for SARS-CoV-2 full length genome (ORF1a probes) and sub-genomic RNAs (N probes) at indicated times post-infection with SARS-CoV-2 (MOI=5).

107 **SARS-CoV-2 infection triggers rapid degradation of host basal mRNAs independently of RNase L**

108  
109 To examine if SARS-CoV-2 infection activated RNase L-mediated mRNA decay, we stained for  
110 host *GAPDH* and *ACTB* basal mRNAs by smFISH. We observed a substantial reduction in *GAPDH* and  
111 *ACTB* mRNAs in SARS-CoV-2-infected cells WT<sup>ACE2</sup> cells as early as eight hours post-infection (Fig. 2A,B  
112 and Fig. S2). Unexpectedly, we also observed a reduction in *GAPDH* and *ACTB* mRNAs in SARS-CoV-  
113 2-infected RL-KO<sup>ACE2</sup> cells (Fig. 2C,D), indicating that the reduction in host basal mRNAs in response to  
114 SARS-CoV-2 infection can occur independently of RNase L.

115  
116 However, several observations indicate that RNase L is activated by SARS-CoV-2 infection. First  
117 and consistent with RNase L reducing SARS-CoV-2 replication by ~4-fold (Li et al., 2020), we observed  
118 that RNase L reduced both FL-genome and N-RNA by ~3-fold as compared to the RL-KO<sup>ACE2</sup> cells (Fig.  
119 S3A-C). Second, we observed robust RNase L-dependent accumulation of PABP in the nucleus by twenty-  
120 four hours post-infection (Fig. S3D), which is a previously reported consequence of RNase L activation  
121 (Burke et al., 2019). In contrast, despite widespread mRNA degradation in the RL-KO<sup>ACE2</sup> cells, PABP did  
122 not translocate to the nucleus (Figure S3D). Lastly, we observed small punctate PABP-positive foci  
123 consistent with RLBs (RNase L-dependent bodies) (Burke et al., 2019; Burke et al., 2020) (Fig. S3E).

124  
125 Combined, these data indicate that SARS-CoV-2 infection leads to widespread degradation of host  
126 mRNAs both by the activation of RNase L, and by a second RNase L-independent mechanism.

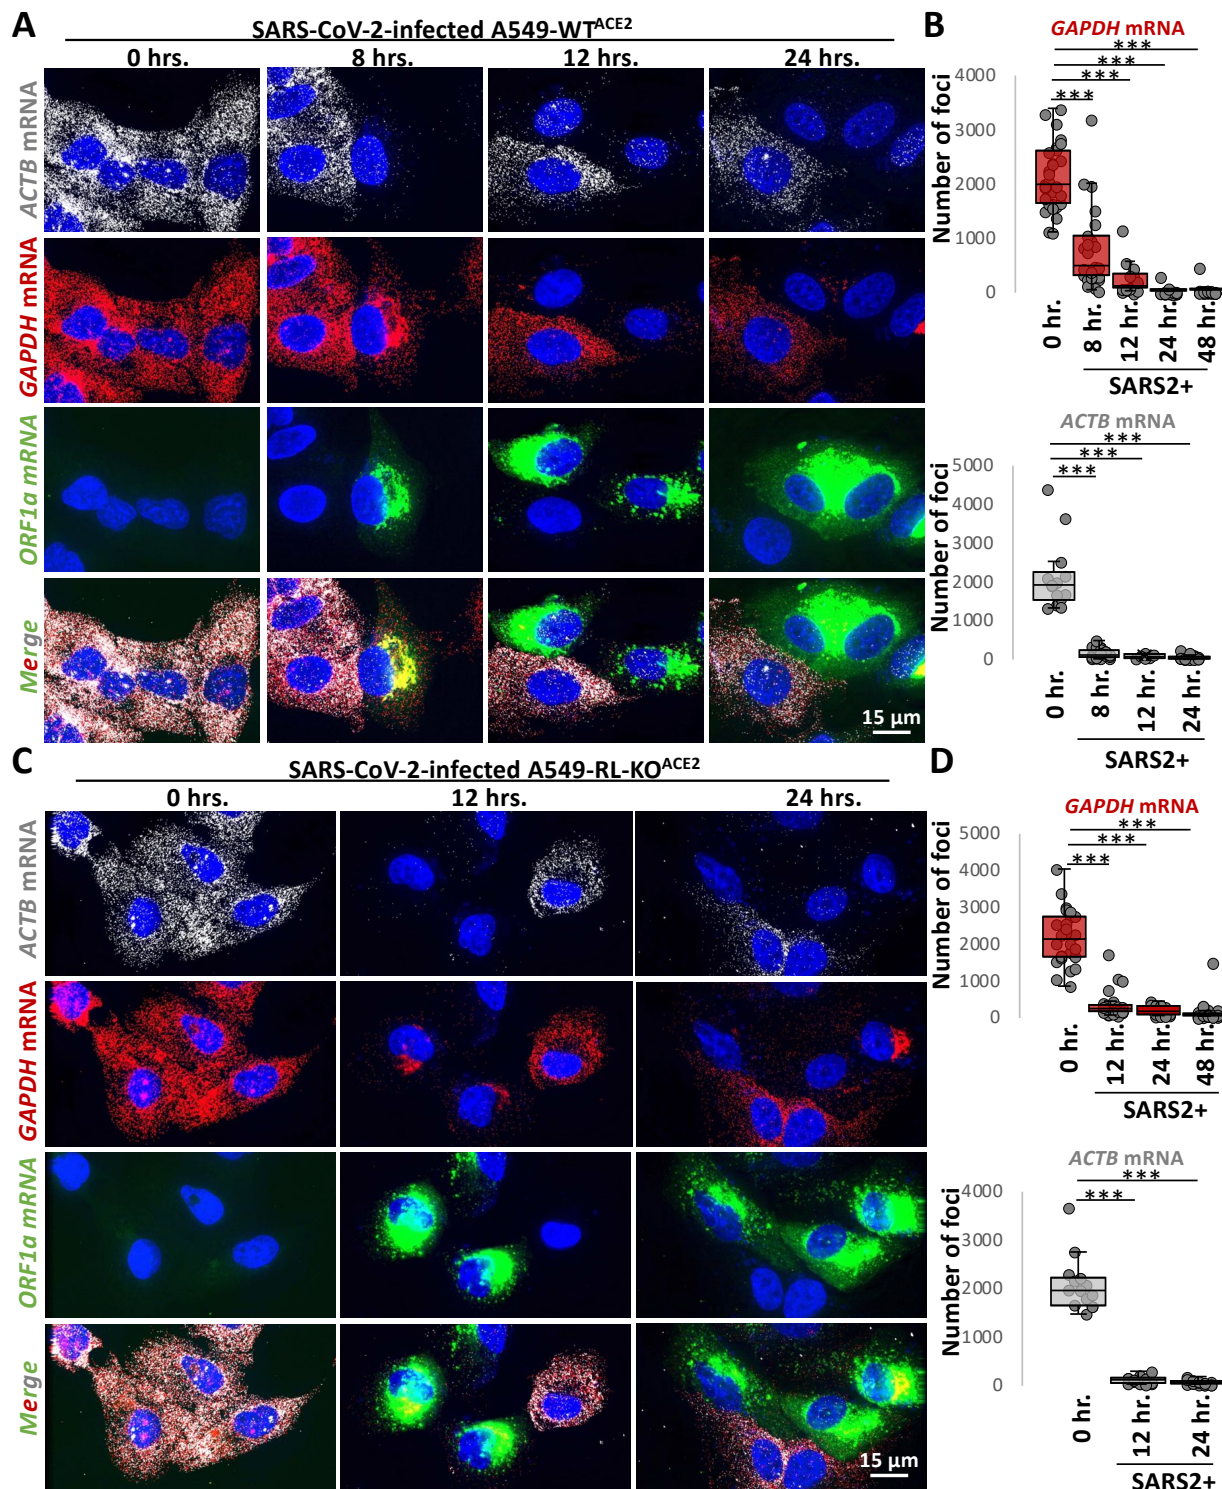

127  
 128 **Fig 2. Host RNAs are rapidly degraded in response to SARS-CoV-2 infection, independently of RNase**  
 129 **L.**  
 130 (A) smFISH for host *GAPDH* and *ACTB* mRNAs and SARS-CoV-2 full-length genome (ORF1b) at indicated times  
 131 post-infection with SARS-CoV-2 (MOI=5) in WT<sup>ACE2</sup> A549 cells. (B) Graphs show quantification of *GAPDH* and  
 132 *ACTB* mRNAs as represented in above images. (C and D) Similar to (A and B) but in RL-KO<sup>ACE2</sup> A549 cells.



133 **SARS-CoV-2 Nsp1 expression is sufficient for degradation of host basal mRNAs**

134

135 The degradation of host basal mRNAs in the RL-KO<sup>ACE2</sup> cells could either be an RNase L-  
136 independent host response or mediated by viral proteins. We hypothesized that either the Nsp1 or Nsp15  
137 proteins encoded by SARS-CoV-2 could be responsible for host mRNA decay since Nsp1 can reduce host  
138 mRNA levels during coronavirus infection, possibly by inhibiting their translation (Narayanan et al., 2008;  
139 Schubert et al., 2020), and Nsp15 is an endoribonuclease that processes viral RNA (Bhardwaj et al., 2008),  
140 but could potentially cleave host mRNAs.

141

142 We generated flag-tagged SARS-CoV-2 Nsp1 or Nsp15 expression vectors and transfected them  
143 into U2-OS cells (Fig. 3A,B). In cells transfected with flag-Nsp1 (identified by staining for the flag epitope),  
144 both *ACTB* and *GADPH* mRNAs were strongly reduced in comparison to cells that did not stain for flag or  
145 cells transfected with empty vector (Fig. 3C,D). Expression of flag-Nsp15 did not result in notable reduction  
146 of *ACTB* and *GADPH* mRNAs (Fig. 3C,D). These data indicate that expression of SARS-CoV-2 Nsp1  
147 protein is sufficient to initiate the widespread degradation of host basal mRNAs, arguing that Nsp1  
148 contributes to host mRNA degradation during SARS-CoV-2 infection.

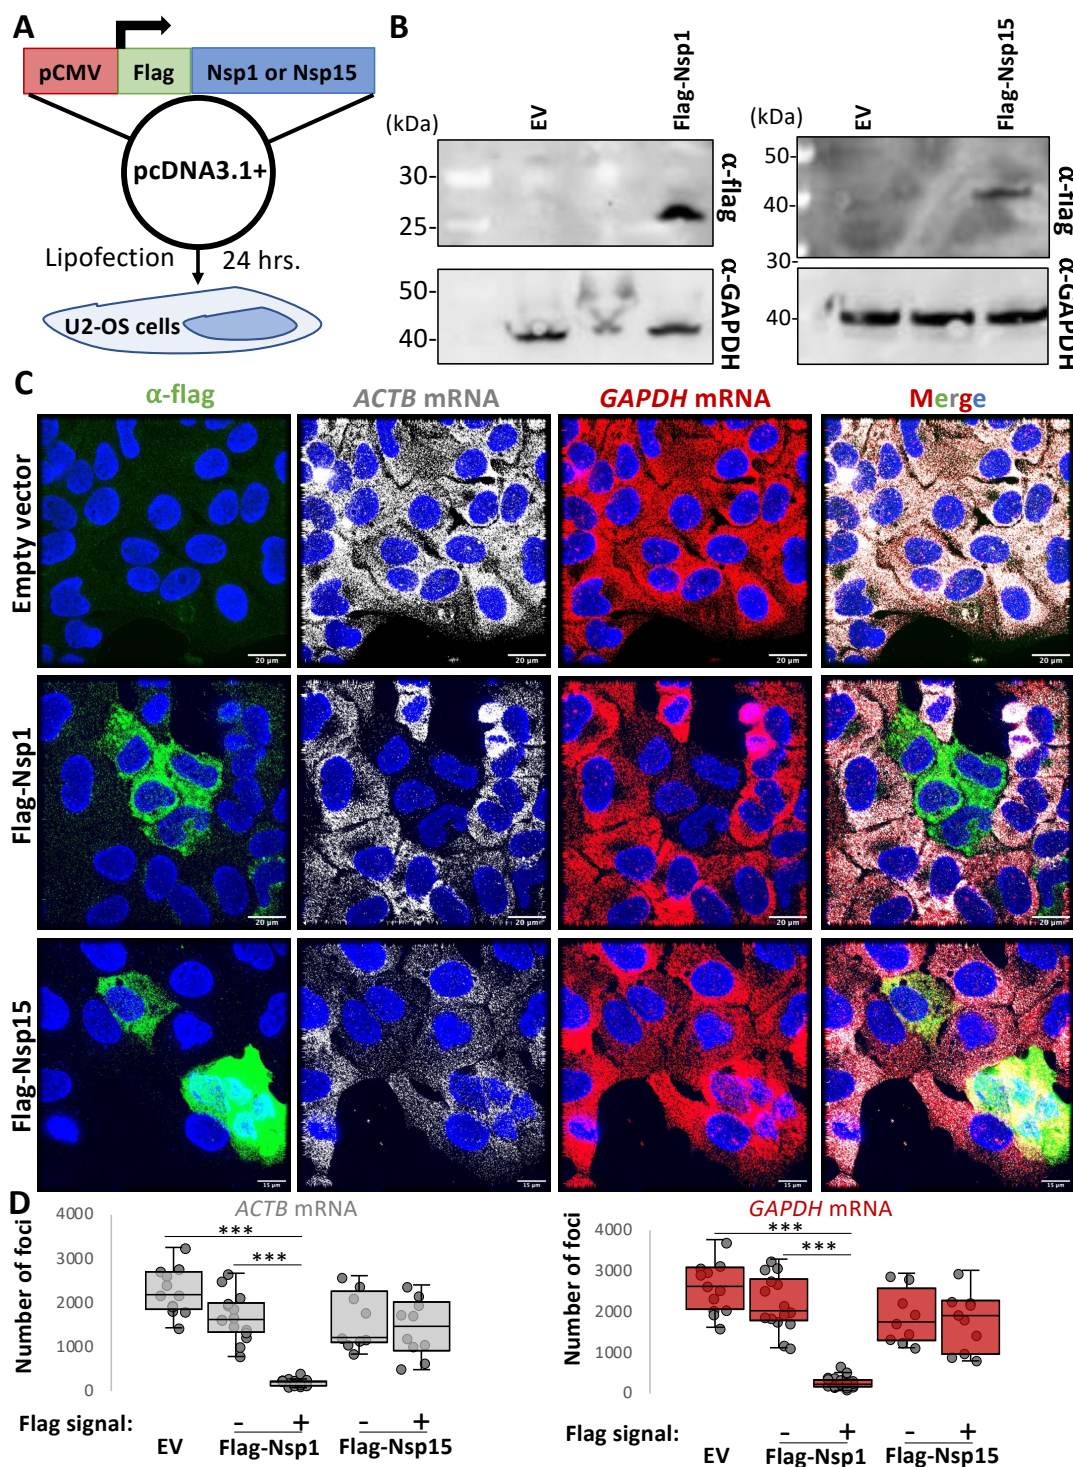

149  
150  
151  
152  
153  
154  
155  
156  
157  
158

**Figure 3. SARS-CoV-2 Nsp1 expression is sufficient for degradation of host basal mRNAs.**

(A) Schematic of flag-tagged SARS-CoV-2 protein expression vector transfected into U2-OS cells. (B) Immunoblot for flag confirmed expression of flag-tagged Nsp1 and Nsp15 expression at expected size (Nsp1 ~20 kDa; Nsp15 ~40kDa) in cells transfected with respective expression vectors but not empty vector (EV). (C) Immunofluorescence assay for flag and smFISH for *ACTB* and *GAPDH* mRNAs in U2-OS twenty-four hours post transfection with either pcDNA3.1+ (empty vector; EV), flag-Nsp1, or flag-Nsp15 expression vectors. (D) Quantification of *ACTB* and *GAPDH* mRNAs as represented in (C). Statistical significance (\* $p < 0.05$ ; \*\* $p < 0.005$ ; \*\*\* $p < 0.0005$ ) was determined by t-test.

## 159 **Alterations to type I and type III *IFN* mRNA biogenesis during SARS-CoV-2 infection**

160  
161 The observations that SARS-CoV-2 both activates RNase L (Fig. S3) and also promotes decay of  
162 host basal mRNAs via Nsp1 (Fig. 2 and 3) suggests that *IFN* mRNAs might be retained in the nucleus due  
163 to an mRNA export block triggered by widespread cytosolic RNA degradation (Burke et al., 2021). Given  
164 this possibility, we examined the expression of *IFN* mRNAs by smFISH during SARS-CoV-2 infection.  
165 These experiments revealed three important insights into how SARS-CoV-2 affects *IFN* production.

### 166 *SARS-CoV-2 infection induces RLR-MAVS-IRF3/7 signaling similar to dsRNA mimics*

167  
168  
169 We observed that SARS-CoV-2 infection generally triggers RLR-MAVS-IRF3/7 signaling, leading  
170 to transcriptional induction of *IFN* genes. This is based on the observation that 45% of SARS-CoV-2-  
171 infected A549-WT<sup>ACE2</sup> cells stain positive for abundant disseminated *IFNBI* mRNA and/or nascent *IFNBI*  
172 transcripts at *IFNBI* genomic loci, referred to as transcriptional foci (Burke et al., 2019) (Fig. 4A,C). The  
173 lack of *IFNBI* induction in 55% of SARS-CoV-2-infected cells is likely due to the inherent heterogeneity  
174 of the innate immune response in A549 cells (Burke et al., 2019), since a similar, albeit slightly lower,  
175 percentage (37%) of A549-WT cells that were transfected with poly(I:C) (as determined by RNase L  
176 activation) did not induce *IFNBI* expression (Fig. 4B,C). These data indicate that SARS-CoV-2 infection  
177 often leads to RLR-MAVS-IRF3/7-mediated *IFN* gene induction in A549 cells.

### 178 *SARS-CoV-2 infection leads to retention of IFN mRNAs at sites of transcription and/or nuclear degradation*

179  
180  
181 Importantly, several observations suggest that SARS-CoV-2 either disrupts *IFNBI* mRNA release  
182 from sites of transcription and/or causes nuclear degradation of *IFNBI* mRNA (Fig 4A-D). Specifically, of  
183 the SARS-CoV-2-infected cells that induced *IFNBI*, greater than 82% contained *IFNBI* transcriptional foci  
184 but lacked abundant diffuse *IFNBI* mRNAs (Fig. 4A,D). In these cells, *IFNBI* mRNAs were few in number  
185 and limited to the vicinity of the *IFNBI* transcriptional foci (Fig. 4A). Less than 18% of SARS-CoV-2  
186 infected cells displayed abundant *IFNBI* mRNAs that had disseminated away from the *IFNBI* site of  
187 transcription (Fig. 4A,D). We observed a similar effect staining for *IFNLI* mRNA (Fig. S4A).

188  
189 Our data indicate that the inability of *IFNBI* mRNA to disseminate away from *IFNBI*  
190 transcriptional foci during SARS-CoV-2 infection is not typical of *IFNBI* induction nor a consequence of  
191 RNase L activation. Specifically, of the WT or RL-KO A549 cells that induce *IFNBI* in response to  
192 poly(I:C) lipofection (Fig. 4B,C), greater than 94% displayed widespread dissemination of *IFNBI* mRNA  
193 in the nucleus and/or in the cytoplasm, with very few cells (<6%) displaying clearly identifiable *IFNBI*  
194 transcriptional foci but lacking disseminated *IFNBI* mRNA (Fig. 4B,D and S4B). Since most WT cells  
195 activated RNase L in response to poly(I:C), and all WT cells that induced *IFNBI* also activated RNase L  
196 (Fig. 4B,C), RNase L activation does not cause retention of *IFNBI* mRNA at *IFNBI* transcriptional foci.  
197 Further supporting that RNase L does not cause this effect, we observed this phenomenon in SARS-CoV-  
198 2-infected RL-KO<sup>ACE2</sup> cells (Fig. S4C).

199  
200 These data argue that SARS-CoV-2 infection, as opposed to *IFNBI* induction or RNase L  
201 activation, mediates the inhibition of *IFNBI* mRNA release from the site of transcription. One possible  
202 mechanism for this effect is an alteration in RNA processing, which can prevent the release of mRNAs  
203 from transcriptional foci (Hilleren et al., 2001). Given this, we examined whether *IFNBI* mRNAs were  
204 similarly retained at transcriptional foci during influenza A virus (IAV) infection, which is known to perturb  
205 host mRNA processing and export (Fortes et al., 1994; Hayman et al., 2006; Nemeroff et al., 1998). Indeed,  
206 we observed a similar effect during IAV infection, whereby of the 32% of IAV-infected cells that induced  
207 *IFNBI* (presence of *IFNBI* foci), the majority (96%) lacked abundant disseminated *IFNBI* mRNA but  
208 contained intense *IFNBI* transcriptional foci (Fig. S4C). Therefore, the lack of disseminated *IFNBI*  
209 mRNAs in response to SARS-CoV-2 infection indicates that SARS-CoV-2, as well as IAV, leads to a

210 viral-mediated block in release of *IFN* mRNAs from their sites of transcription and/or rapid degradation of  
211 *IFN* mRNAs upon leaving the site of transcription.



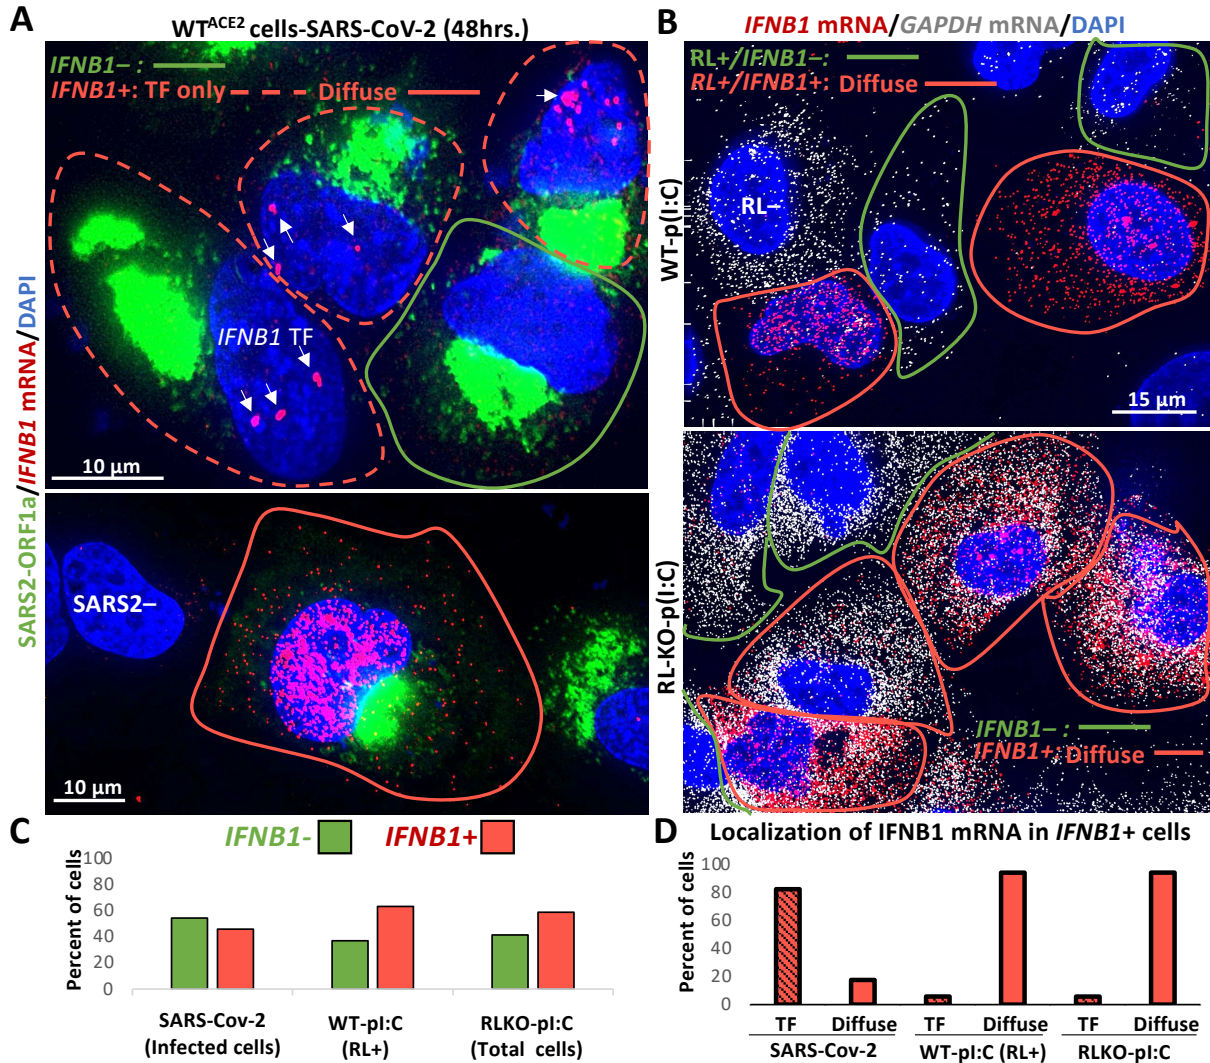

212  
 213 **Fig. 4. *IFN* mRNAs are retained at the site of transcription during SARS-CoV-2 infection.**  
 214 (A) smFISH for *IFNB1* mRNA and SARS-CoV-2 ORF1a forty-eight hours post-infection. Two fields of view are  
 215 shown. In the top image, 45% of SARS-CoV-2-positive cells stain for *IFNB1* (cell boundary marked by red line),  
 216 whereas 55% do not (cell boundary marked by green line). Eighty-two percent of cells that contain *IFNB1*  
 217 transcriptional foci (TF) lack abundant disseminated *IFNB1* mRNA (dashed red line). The lower image shows a  
 218 SARS-CoV-2-infected cell that contains abundant and diffuse *IFNB1* mRNA in the nucleus and cytoplasm (solid red  
 219 line), which constitute less than 18% of cells that induce *IFNB1* (contain *IFNB1* transcriptional foci or mRNA). Cells  
 220 that do not stain for SARS-CoV-2 are labeled SARS2-negative (SARS2-). (B) smFISH for *IFNB1* mRNA and *GAPDH*  
 221 mRNA sixteen hours post-poly(I:C) transfection in WT and RL-KO A549 cells (images of individual staining shown  
 222 in Fig. S4B). In WT cells, 12% do not activate RNase L (RL-). Of the 88% of cells that activate RNase L, 63% (55%  
 223 of total cells) also induce abundant and disseminated *IFNB1* mRNA (cell boundary marked by red line), whereas 37%  
 224 of RL+ cells do not induce *IFNB1* (cell boundary marked by green line). Fifty-nine percent of RL-KO cells induce  
 225 abundant disseminated *IFNB1* mRNA (cell boundary marked by red line), whereas 41% do not (cell boundary  
 226 marked by green line). (C) Histograms quantifying the percent of SARS-CoV-2 infected cells, poly(I:C)-transfected WT cells  
 227 that activate RNase L (*GAPDH* mRNA-negative cells), and poly(I:C)-transfected RL-KO cells that induce *IFNB1*, as  
 228 represented in (A and B). (D) Histograms quantifying the percent of *IFNB1*-positive cells in which *IFNB1* smFISH  
 229 staining is predominantly localized to *IFNB1* transcriptional foci (TF) or diffuse.



230 SARS-CoV-2 infection blocks nuclear export of IFN mRNAs

231

232 A second mechanism we observed by which SARS-CoV-2 infection limits IFN protein production  
233 is by a block in the transport of *IFN* mRNAs from the nucleus to the cytoplasm. The critical observation is  
234 that in SARS-CoV-2 infected cells that induced *IFNBI* and displayed abundant, diffuse *IFNBI* mRNA,  
235 75% retained the majority (>65%) *IFNBI* mRNAs in the nucleus (Fig. 5A,B). Similar results were seen  
236 with *IFNL1* mRNA (Fig. S4E). The nuclear retention of *IFN* mRNAs during SARS-CoV-2 infection is  
237 similar to that observed in response to RNase L activation during poly(I:C) lipofection or dengue virus  
238 serotype 2 (DENV2) infection (Burke et al., 2021).

239

240 However, nuclear retention of *IFN* mRNAs during SARS-CoV-2 infection can occur independently  
241 of RNase L activation. The key observation is that we observed nuclear retention of *IFNBI* mRNA in  
242 SARS-CoV-2-infected RL-KO<sup>ACE2</sup> cells (Fig. 5A,B). This is in contrast to poly(I:C) lipofection or DENV2  
243 infection in RL-KO cells, in which *IFNBI* mRNA is predominantly localized to the cytoplasm (Fig. 5B,C)  
244 (Burke et al., 2021).

245

246 A notable difference between SARS-CoV-2 infection and either poly(I:C) lipofection or DENV  
247 infection in RL-KO cells is that basal mRNAs are only degraded in the context of SARS-CoV-2 infection  
248 (Fig. 5A,C). This suggests that SARS-CoV-2-mediated mRNA decay might be responsible for inhibiting  
249 the nuclear export of *IFNBI* mRNAs, similar to RNase L-mediated mRNA decay (Burke et al., 2021). To  
250 better assess this model, we compared nuclear and cytoplasmic *IFNBI* mRNA levels during SARS-CoV-2  
251 infection, poly(I:C) lipofection, or DENV2 infection in both WT and RL-KO cells.

252

253 This analysis supports that SARS-CoV-2-mediated mRNA decay, similar to RNase L-mediated  
254 mRNA decay, inhibits *IFNBI* mRNA export. Specifically, while median *IFNBI* mRNA levels in the  
255 cytoplasm are ~8-fold higher than in the nucleus of RL-KO cells infected with DENV2 or transfected with  
256 poly(I:C), they are equivalent in SARS-CoV-2-infected RL-KO cells (Fig. 5D). Moreover, the ratio of  
257 nuclear to cytoplasmic *IFNBI* mRNA levels in SARS-CoV-2-infected RL-KO cells is comparable to WT  
258 cells infected with SARS-CoV-2, DENV2, or transfected with poly(I:C) (Fig. 5D). Thus, the high  
259 percentage of cells displaying nuclear retention of *IFNBI* mRNA is specific to scenarios in which  
260 widespread decay of host mRNA occurs, including RNase L activation (Burke et al., 2021) and SARS-  
261 CoV-2 infection (Fig. 2).

262

263 Interestingly, in a fraction of SARS-CoV-2-infected WT<sup>ACE2</sup> or RL-KO<sup>ACE2</sup> cells (25% and 40%  
264 respectively) displaying diffuse *IFNBI* mRNA staining, *IFNBI* mRNA was abundant in the cytoplasm  
265 despite robust decay of *GAPDH* mRNA (Fig. 5A,B). These data indicate that the *IFNBI* mRNA at least  
266 partially evades both RNase L- and Nsp1- mediated mRNA decay mechanisms during SARS-CoV-2  
267 infection when the *IFNBI* mRNA is successfully exported to the cytoplasm. This is similar to results seen  
268 with activation of RNase L either by poly(I:C) transfection or DENV2 infection (Burke et al., 2019; Burke  
269 et al., 2021).

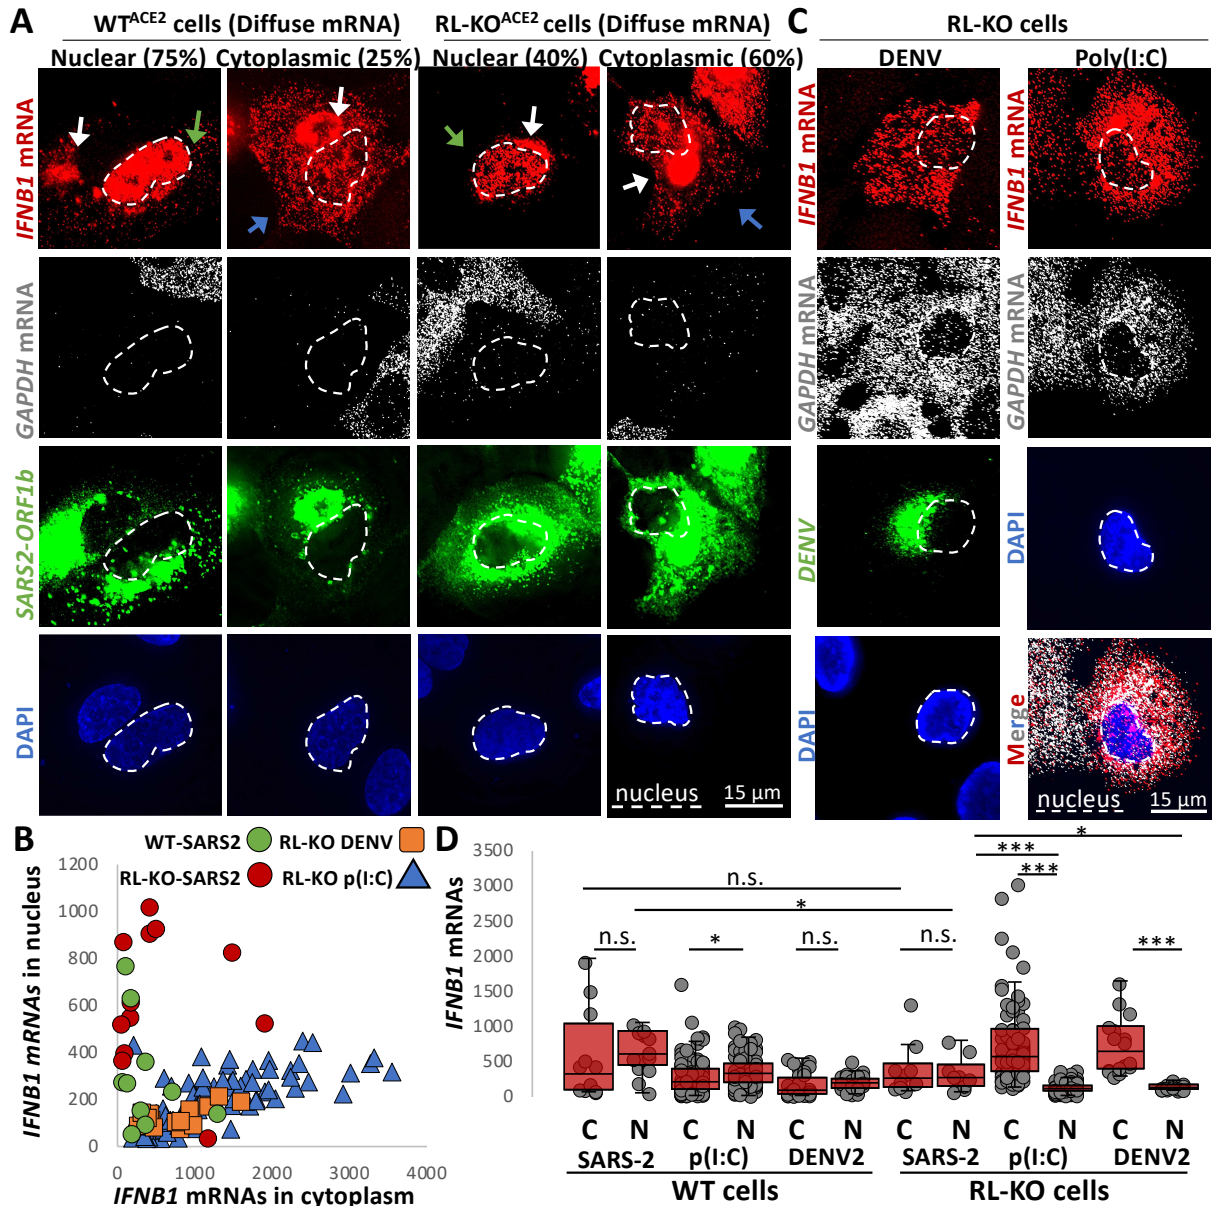

270  
 271 **Fig. 5. Nuclear-cytoplasmic transport of *IFN* mRNAs is inhibited during SARS-CoV-2 infection.**  
 272 (A) smFISH for *IFNB1* mRNA, *GAPDH* mRNA, and SARS-CoV-2 *ORF1b* mRNA in WT<sup>ACE2</sup> and RL-KO<sup>ACE2</sup> cells  
 273 forty-eight hours post-infection with SARS-CoV-2 (MOI=5). Spectral crossover from the SARS-CoV-2 *ORF1b* RF  
 274 into the *IFNB* mRNA channel is indicated by white arrows. The green arrows indicate cells in which *IFNB* mRNA is  
 275 retained in the nucleus. The blue arrows indicate cells in which *IFNB* mRNA is localized to the cytoplasm. (B) Scatter  
 276 plot quantifying *IFNB1* mRNA in the nucleus (y-axis) and in the cytoplasm (x-axis) in individual WT<sup>ACE2</sup> or RL-  
 277 KO<sup>ACE2</sup> cells infected with SARS-CoV-2, or RL-KO cells 48 hrs. post-infection with DENV or 8 hours post-  
 278 transfection with poly(I:C). (C) Representative smFISH for *IFNB1* and *GAPDH* mRNAs in RL-KO A549 cells forty-  
 279 eight hours post infection with DENV (MOI=0.1) or 16 hours post-transfection with poly(I:C). (D) Quantification of  
 280 *IFNB1* mRNA via smFISH in the nucleus (N) or cytoplasm (C) of either WT<sup>ACE2</sup> or RL-KO<sup>ACE2</sup> cells infected with  
 281 SARS-CoV-2, and WT or RL-KO cells transfected with poly(I:C) or infected with DENV2 as represented in (A and  
 282 C). Poly(I:C) and DENV2 data was obtained from Burke et al., 2021. Statistical significance (\*p<0.05; \*\*p<0.005;  
 283 \*\*\*p<0.0005) was determined by t-test.

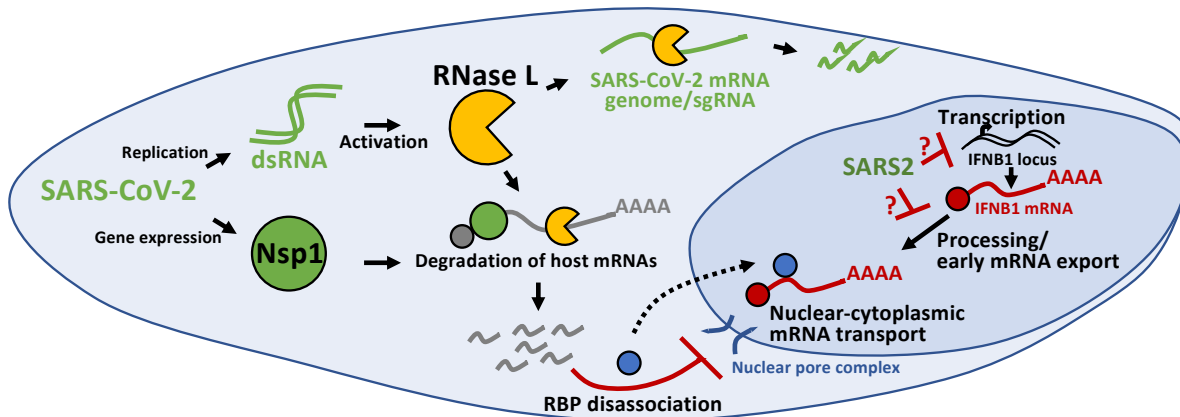

284  
285  
286  
287  
288  
289  
290  
291  
292  
293  
294  
295  
296  
297

**Fig. 6 Inhibition of antiviral mRNA biogenesis during SARS-CoV-2 infection.**

Schematic modeling how antiviral mRNA biogenesis is inhibited during SARS-CoV-2 infection. SARS-CoV-2 replication generates double-stranded RNA (dsRNA), which leads to RNase L activation. RNase L-mediated mRNA decay reduces SARS-CoV-2 full-length mRNA genome and sub-genomic mRNAs. In addition, SARS-CoV-2 expresses the viral Nsp1 protein. Both RNase L activation and Nsp1 expression result in rapid and widespread decay of host basal mRNAs. While RNase L directly cleaves mRNAs, the mechanism of Nsp1-mediated mRNA decay is unclear. The degradation of host mRNAs results in release of RNA-binding proteins (RBPs), and this perturbs late stages of nuclear-cytoplasmic RNA transport. The sequestration of antiviral mRNAs, such as *IFNB1* mRNA, in the nucleus prevents their association with ribosomes in the cytoplasm, reducing their translation for protein production. In addition, SARS-CoV-2 inhibits the transcription, an aspect of mRNA processing, or association with early mRNA export factors, and/or rapidly degrades dsRNA-induced antiviral mRNAs, such as *IFNB1* mRNA. The result of this is the inability of *IFNB1* mRNAs to exit the site of *IFNB1* transcription, preventing their transport to the cytoplasm and reducing their translation.

## 298 Discussion

299

300

301

302

303

304

305

306

307

308

309

310

311

312

313

314

315

316

317

318

319

320

321

322

323

324

325

326

327

328

329

330

331

332

333

334

335

336

337

338

339

340

341

342

343

344

345

346

347

Several observations support that SARS-CoV-2 infection perturbs *IFN* mRNA biogenesis, limiting *IFN* mRNAs from reaching the cytoplasm where they can be translated (Fig. 6). First, *IFN* genes are induced in ~45% of SARS-CoV-2-infected cells, indicating that RLR-MAVS-IRF3/7 signaling is initiated by SARS-CoV-2, consistent with a previous report (Li et al., 2020). However, we observed that both type I- and type III *IFN*-encoding mRNAs predominately localize to their transcriptional sites in a majority of cells (Fig. 4A,D and S4A). Since this effect is atypical of *IFN* induction and not a consequence of RNase L activation in response to poly(I:C) (Fig. 4B,D), we suggest that SARS-CoV-2 inhibits some aspect of RNA processing or an early step of mRNA export, either of which is necessary for efficient release of stable mRNAs from transcription sites (Hilleren et al., 2001). Notably, we observed a similar phenomenon occurring during IAV infection (Fig. S4D), which is known to perturb host mRNA processing and export (Fortes et al., 1994; Hayman et al., 2006; Nemeroff et al., 1998).

In addition to inhibition of early mRNA processing/export, we observed phenotypes consistent with the inhibition of the late steps of nuclear-cytoplasmic mRNA transport during SARS-CoV-2 infection. Specifically, we observed that the majority of cells in which *IFN* mRNAs were released from the sites of transcription retained those *IFN* mRNAs within, but disseminated throughout, the nucleus in SARS-CoV-2-infected cells (Fig. 5A). However, the mRNA export block of *IFN* mRNAs is distinct from the accumulation of *IFN* mRNAs at transcriptional foci since a similar mRNA export block is triggered by RNase L without reduction of transcription nor trapping of mRNAs at the transcription site in both poly(I:C)-treated and DENV2-infected cells (Burke et al., 2021) (Fig. 4A-D).

The inhibition of nuclear mRNA export by SARS-CoV-2 infection can be understood as a direct consequence of widespread mRNA degradation in the cytosol. The key observation is that we observed rapid and widespread decay of host basal mRNAs in response to SARS-CoV-2 (Fig. 2), which could be mediated by RNase L activation (Fig. S3) and/or the SARS-CoV-2 Nsp1 protein (Fig. 3). Moreover, since we have recently shown that RNase L-mediated mRNA decay inhibits mRNA export of *IFN* mRNAs (Burke et al., 2021), these data argue that either RNase L- or SARS-CoV-2-Nsp1-mediated mRNA decay leads to inhibition of host mRNA export. It should be noted that RNase L per se is not required for this export block since we observed *IFN* mRNAs trapped in the nucleus in RNase L knockout cells where widespread mRNA degradation is driven by Nsp1 (Figs. 3 and 5A,B,D). Regardless of the nuclease responsible for mRNA destruction, the nuclear retention of *IFN* mRNAs away from ribosomes would consequently reduce *IFN* protein production in response to SARS-CoV-2 infection.

Although the detailed mechanism of the mRNA export block is unknown, it appears to be a general consequence of any widespread cytosolic mRNA degradation. This mechanism is suggested by the observations that mRNA export blocks occur due to activation of RNase L (Burke et al., 2021), the nuclease SOX2 produced by Kaposi's sarcoma-associated herpesvirus (KSHV) (Gilbertson et al., 2018; Glaunsinger et al., 2005; Kumar and Glaunsinger, 2010), and by degradation of mRNAs by Nsp1 in RL-KO cells (Figs. 3 and 4E). A likely explanation for the export block is that widespread cytosolic mRNA degradation leads to re-localization of numerous RNA binding proteins to the nucleus (Khong and Parker 2020, RNA; Burke et al., 2019; Kumar and Glaunsinger, 2010), which would then compete for the binding of export factors to mRNAs. Consistent with that hypothesis, overexpression of the mRNA export factor NXF1 (Nuclear RNA Export Factor 1) has been suggested to overcome an mRNA export block due to Nsp1 binding to NXF1 (Zhang et al., 2021). However, we anticipate that Nsp1 binding to NXF1 would not be required for inhibition of mRNA export in SARS-CoV-2 infected cells since anytime mRNAs are degraded via RNase L activation, which happens in SARS-CoV-2 infections (Fig. S3) (Li et al., 2020), there is a robust mRNA export block independent of any viral protein (Burke et al., 2021). Moreover, we observe inhibition of *IFNB1* mRNA export during SARS-CoV-2 infections, which is exported by CRM1-dependent export

348 pathway and is independent of NXF1 (Fig. 5A) (Burke et al., 2021). An important issue for future research  
349 is to understand the factors that compete for mRNA export once cytosolic mRNAs are degraded.

350

351         Despite rapid degradation of host basal mRNAs, SARS-CoV-2 RNAs appeared to be largely  
352 unaffected since they increased over time and were only modestly reduced by RNase L (Figs. 1, S2, S3).  
353 Similarly, in cells in which *IFNB* mRNAs were exported to the cytoplasm, *IFNBI* mRNAs appeared to be  
354 stable since they were abundant despite complete decay of basal mRNAs (Fig. 5A), similar to *IFNBI*  
355 mRNA escaping RNase L-mediated mRNA decay (Burke et al., 2019). Importantly, this indicates that *IFN*  
356 mRNAs evade SARS-CoV-2-mediated mRNA decay mechanisms, making rescue of host mRNA  
357 processing and export a viable option for increasing IFN protein production.

358 **Materials and methods**

359

360 *Cell culture*

361

362 Parental and RNase L-KO (RL-KO) A549, U2-OS, and HEK293T cell lines are described in Burke  
363 et al., 2019. Cells were maintained at 5% CO<sub>2</sub> and 37 degrees Celsius in Dulbecco's modified eagle'  
364 medium (DMEM) supplemented with fetal bovine serum (FBS; 10% v/v) and penicillin/streptomycin (1%  
365 v/v). Cells were routinely tested for mycoplasma contamination by the cell culture core facility. Cells were  
366 transfected with poly(I:C) HMW (InvivoGen: tlr1-pic) using 3- $\mu$ l of lipofectamine 2000 (Thermo Fisher  
367 Scientific) per 1- $\mu$ g or poly(I:C). African green monkey kidney cells (Vero E6, ATCC CRL-1586) were  
368 maintained at 5% CO<sub>2</sub> and 37 degrees Celsius in DMEM supplemented with FBS (10% v/v), 2 mM non-  
369 essential amino acids, 2 mM l-glutamine, and 25 mM HEPES buffer.

370

371 *Plasmids*

372

373 The flag-Nsp1 and flag-Nsp15 vectors were generated by ligating a g-block [Integrated DNA  
374 Technologies (IDT)] encoding for the flag and ORF of Nsp1 or Nsp15 between the *xho*1 and *xba*1 sites in  
375 pcDNA3.1+. Plasmids were sequence verified. The pLEX307-ACE2-puro plasmid was a gift from  
376 Alejandro Chavez and Sho Iketani (Addgene plasmid # 158448; <http://n2t.net/addgene:158448>;  
377 RRID:Addgene\_158448).

378

379 *Viral infections*

380

381 SARS-CoV-2/WA/20/01 (GenBank MT020880) was acquired from BEI Resources (NR-52881)  
382 and used for all infections. The virus was passaged in Vero E6 cells, and viral titer was determined via  
383 plaque assay on Vero E6 as previously described in (Dulbecco et al., 1953). A multiplicity of infection  
384 (MOI) of 5 was used unless otherwise noted. All cell culture and plate preparation work were conducted  
385 under biosafety level 2 conditions, while all viral infections were conducted under biosafety level 3  
386 conditions at Colorado State University. For infections, cells were seeded in 6-wells format onto cover  
387 slips. Twenty-four hours later, cell growth medium was removed, and cells were inoculated with SARS-  
388 CoV-2 at the indicated MOI for 1 hour at room temperature to allow for viral adherence. After incubation,  
389 viral inoculum was removed, cells were washed with 1X PBS, and DMEM supplemented with 2% FBS  
390 (v/v) was added to each well. Cells were fixed in 4% paraformaldehyde and phosphate-buffered solution  
391 (PBS) for 20 minutes, followed by three five-minute washes with 1X PBS, and stored in 75% ethanol.  
392 Following paraformaldehyde fixation, plates were removed from BSL3 facility, and stored at 4 degrees  
393 Celsius until staining. A549 cells were infected with dengue virus serotype 2 16681 strain at an MOI of 0.1,  
394 and with influenza A/Udorn/72 virus strain at MOI of 0.5, as described in Burke et al., 2021.

395

396 *Generation of ACE2-expressing cell lines*

397

398 HEK293T cells (T-25 flask; 80% confluent) were co-transfected with 2.4- $\mu$ g of pLenti- pLex307-  
399 ACE lentiviral transfer plasmid (Addgene: 158448), 0.8- $\mu$ g of pVSV-G, 0.8- $\mu$ g of pRSV-Rev, and 1.4- $\mu$ g  
400 of pMDLg-pRRE using 20- $\mu$ l of lipofectamine 2000. Media was collected at twenty-four- and forty-eight-  
401 hours post-transfection and filter-sterilized with a 0.45- $\mu$ m filter. To generate A549<sup>ACE2</sup> line, cells were  
402 incubated for 1 hour with 1-ml of ACE2-encoding lentivirus with 10- $\mu$ g of polybrene. Normal medium was  
403 then added to the flask and incubated for twenty-four hours. Medium was removed 24 hours post-  
404 transduction and replaced with selective growth medium containing 2- $\mu$ g/ml of puromycin (Sigma-  
405 Aldrich). Selective medium was changed every three days. After one-week, selective medium was replaced  
406 with normal growth medium. Expression of ACE2 was confirmed via immunoblot analysis (protocol  
407 described in Burke et al., 2019) using Anti-Angiotensin Converting Enzyme 2 antibody [EPR4435(2)  
408 (Abcam: ab108252) at 1:1000.

409

410 *Single-molecule fluorescent in situ hybridization (smFISH) and immunofluorescence assays*

411

412 smFISH was performed following manufacturer's protocol  
413 ([https://biosearchassets.blob.core.windows.net/assets/bti\\_custom\\_stellaris\\_immunofluorescence\\_seq\\_protocol.pdf](https://biosearchassets.blob.core.windows.net/assets/bti_custom_stellaris_immunofluorescence_seq_protocol.pdf)) and as described in Burke et al., 2019 and Burke et al., 2021. GAPDH and ACTB smFISH probes  
414 labeled with Quasar 570 Dye (GAPDH: SMF-2026-1) or Quasar 670 Dye (GAPDH: SMF- 2019-1) (ACTB:  
415 VSMF-2003-5) were purchased from Stellaris. Custom IFNB1, IFNL1, and SARS-CoV-2 smFISH probes  
416 were designed using Stellaris smFISH probe designer (Biosearch Technologies) available online at  
417 <http://www.biosearchtech.com/stellaris-designer>. Reverse complement DNA oligos were purchased from  
418 IDT (Extended data file 1). The probes were labeled with Atto-633 using ddUTP-Atto633 (Axxora; JBS-  
419 NU-1619-633), with ATTO-550 using 5-Propargylamino-ddUTP (Axxora; JBS-NU-1619-550), or ATTO-  
420 488 using 5-Propargylamino-ddUTP (Axxora; JBS-NU-1619-488) with terminal deoxynucleotidyl  
421 transferase (Thermo Fisher Scientific: EP0161) as described in (Gaspar et al., 2017).  
422

423 For immunofluorescence detection, cells were incubated with Rabbit polyclonal anti-PABP  
424 antibody (Abcam: ab21060) and Mouse monoclonal anti-G3BP antibody (Abcam: ab56574) primary  
425 antibodies at 1:1000 for two hours, washed three times, and then incubated with Goat Anti-Rabbit IgG  
426 H&L (Alexa Fluor® 647) (Abcam: ab150079) and Goat Anti-Mouse IgG H&L (FITC) (Abcam; ab97022)  
427 at 1:2000 for one hour. After three washes, cells were fixed and then smFISH protocol was performed.  
428

#### 429 *Microscopy and Image Analysis*

430

431 Microscopy was performed as described in Burke et al., 2021. Briefly, cover slips were mounted on slides  
432 with VECTASHIELD Antifade Mounting Medium with DAPI (Vector Laboratories; H-1200). Images were  
433 obtained using a wide field DeltaVision Elite microscope with a 100X objective using a PCO Edge sCMOS  
434 camera. 10 Z planes at 0.2 um/section were taken for each image. Deconvoluted images were processed  
435 using ImageJ with FIJI plugin. Z-planes were stacked, and minimum and maximum display values were set  
436 in ImageJ for each channel to properly view fluorescence. Imaris Image Analysis Software (Bitplane)  
437 (University of Colorado-Boulder, BioFrontiers Advanced Light Microscopy Core) was used to quantify  
438 smFISH foci in nucleus and cytoplasm. Fluorescent intensity was quantified in ImageJ.

439 **Acknowledgments**

440 The authors thank Dr. Carolyn Decker for valuable comments regarding the manuscript. Research  
441 reported in this publication was supported by the National Institute of Allergy and Infectious Diseases of  
442 the National Institutes of Health under Award Number F32AI145112 (J.M.B), funds from HHMI (Roy  
443 Parker), and support provided by the Office of the Vice President for Research and the Dept. of  
444 Microbiology, Immunology and Pathology at Colorado State University (Rushika Perera).



445 **Author contributions:**

446 J.M.B and Roy Parker conceived the project. L.A.S. performed SARS-CoV-2 infections. J.M.B. generated  
447 cell lines and plasmids, performed microscopy, and quantified microscopy data. J.M.B., L.A.S., Rushika  
448 Perera., and Roy Parker. interpreted data. J.M.B. and Roy Parker wrote the manuscript.  
449

450 **Competing interests**  
451 Roy Parker is a founder and consultant of Faze Medicines.

452 **References**

453

454 Bhardwaj K, Palaninathan S, Alcantara JMO, Li Yi L, Guarino L, Sacchettini JC, Kao CC. Structural and  
455 functional analyses of the severe acute respiratory syndrome coronavirus endoribonuclease Nsp15.  
456 J Biol Chem. 2008 Feb 8;283(6):3655-3664. doi: 10.1074/jbc.M708375200. Epub 2007 Nov 28.  
457 PMID: 18045871.

458 Blanco-Melo D, Nilsson-Payant BE, Liu WC, Uhl S, Hoagland D, Møller R, Jordan TX, Oishi K, Panis M,  
459 Sachs D, Wang TT, Schwartz RE, Lim JK, Albrecht RA, tenOever BR. Imbalanced Host Response  
460 to SARS-CoV-2 Drives Development of COVID-19. Cell. 2020 May 28;181(5):1036-1045.e9.

461 Burke JM, Lester ET, Tauber D, Parker R. RNase L promotes the formation of unique ribonucleoprotein  
462 granules distinct from stress granules. J Biol Chem. 2020 Feb 7;295(6):1426-1438. doi:  
463 10.1074/jbc.RA119.011638. Epub 2020 Jan 2. PMID: 31896577; PMCID: PMC7008361.

464 Burke JM, Moon SL, Matheny T, Parker R. RNase L Reprograms Translation by Widespread mRNA  
465 Turnover Escaped by Antiviral mRNAs. Mol Cell. 2019 Sep 19;75(6):1203-1217.e5. doi:  
466 10.1016/j.molcel.2019.07.029. Epub 2019 Sep 4. PMID: 31494035; PMCID: PMC6754297.

467 Burke JM, Gilchrist AR, Sawyer SL, Parker R. RNase L limits host and viral protein synthesis via inhibition  
468 of mRNA export. bioRxiv 2021.04.18.440343; doi: <https://doi.org/10.1101/2021.04.18.440343>.

469 Dulbecco, R, Vogt M. Some problems of animal virology as studied by the plaque technique. Cold Spring  
470 Harb Symp Quant Biol. 1953; 18:273-279. Doi: 10-1101/sqb.1953.018.01.039. PMID: 13168995.

471 Fortes P, Beloso A, Ortín J. Influenza virus NS1 protein inhibits pre-mRNA splicing and blocks mRNA  
472 nucleocytoplasmic transport. EMBO J. 1994 Feb 1;13(3):704-12. PMID: 8313914; PMCID:  
473 PMC394862.

474 Gaspar I, Wippich F, Ephrussi A. Enzymatic production of single-molecule FISH and RNA capture probes.  
475 RNA. 2017 Oct;23(10):1582-1591. doi: 10.1261/rna.061184.117. Epub 2017 Jul 11. PMID:  
476 28698239; PMCID: PMC5602115.

477 Gilbertson S, Federspiel JD, Hartenian E, Cristea IM, Glaunsinger B. Changes in mRNA abundance drive  
478 shuttling of RNA binding proteins, linking cytoplasmic RNA degradation to transcription. Elife.  
479 2018 Oct 3;7:e37663. doi: 10.7554/eLife.37663. PMID: 30281021; PMCID: PMC6203436.

480 Glaunsinger B, Chavez L, Ganem D. The exonuclease and host shutoff functions of the SOX protein of  
481 Kaposi's sarcoma-associated herpesvirus are genetically separable. J Virol. 2005 Jun;79(12):7396-  
482 401. doi: 10.1128/JVI.79.12.7396-7401.2005. PMID: 15919895; PMCID: PMC1143623.

483 Hadjadj J, Yatim N, Barnabei L, Corneau A, Boussier J, Smith N, Péré H, Charbit B, Bondet V, Chenevier-  
484 Gobeaux C, Breillat P, Carlier N, Gauzit R, Morbieu C, Pène F, Marin N, Roche N, Szwebel TA,  
485 Merklings SH, Treluyer JM, Veyer D, Mouthon L, Blanc C, Tharaux PL, Rozenberg F, Fischer A,  
486 Duffy D, Rieux-Laucat F, Kernéis S, Terrier B. Impaired type I interferon activity and  
487 inflammatory responses in severe COVID-19 patients. Science. 2020 Aug 7;369(6504):718-724.  
488 doi: 10.1126/science.abc6027. Epub 2020 Jul 13. PMID: 32661059; PMCID: PMC7402632.

489 Hayman A, Comely S, Lackenby A, Murphy S, McCauley J, Goodbourn S, Barclay W. Variation in the  
490 ability of human influenza A viruses to induce and inhibit the IFN-beta pathway. Virology. 2006  
491 Mar 30;347(1):52-64. doi: 10.1016/j.virol.2005.11.024. Epub 2005 Dec 27. PMID: 16378631.

492 Hilleren P, McCarthy T, Rosbash M, Parker R, Jensen TH. Quality control of mRNA 3'-end processing is  
493 linked to the nuclear exosome. Nature. 2001 Oct 4;413(6855):538-42. doi: 10.1038/35097110.  
494 PMID: 11586364.

495 Ivashkiv LB, Donlin LT. Regulation of type I interferon responses. *Nat Rev Immunol.* 2014 Jan;14(1):36-  
496 49. doi: 10.1038/nri3581. PMID: 24362405; PMCID: PMC4084561.

497 Jensen S, Thomsen AR. Sensing of RNA viruses: a review of innate immune receptors involved in  
498 recognizing RNA virus invasion. *J Virol.* 2012 Mar;86(6):2900-10. doi: 10.1128/JVI.05738-11.  
499 Epub 2012 Jan 18. PMID: 22258243; PMCID: PMC3302314.

500 Khong A, Parker R. The landscape of eukaryotic mRNPs. *RNA.* 2020 Mar;26(3):229-239. doi:  
501 10.1261/rna.073601.119. Epub 2019 Dec 26. PMID: 31879280; PMCID: PMC7025503.

502 Kumar GR, Glaunsinger BA. Nuclear import of cytoplasmic poly(A) binding protein restricts gene  
503 expression via hyperadenylation and nuclear retention of mRNA. *Mol Cell Biol.* 2010  
504 Nov;30(21):4996-5008. doi: 10.1128/MCB.00600-10. Epub 2010 Sep 7. PMID: 20823266;  
505 PMCID: PMC2953054.

506 Lavine JS, Bjornstad ON, Antia R. Immunological characteristics govern the transition of COVID-19 to  
507 endemicity. *Science.* 2021 Feb 12;371(6530):741-745. doi: 10.1126/science.abe6522. Epub 2021  
508 Jan 12. PMID: 33436525; PMCID: PMC7932103.

509 Lazear HM, Schoggins JW, Diamond MS. Shared and Distinct Functions of Type I and Type III  
510 Interferons. *Immunity.* 2019;50(4):907-923. doi:10.1016/j.immuni.2019.03.025

511 Lee JS, Park S, Jeong HW, Ahn JY, Choi SJ, Lee H, Choi B, Nam SK, Sa M, Kwon JS, Jeong SJ, Lee HK,  
512 Park SH, Park SH, Choi JY, Kim SH, Jung I, Shin EC. Immunophenotyping of COVID-19 and  
513 influenza highlights the role of type I interferons in development of severe COVID-19. *Sci*  
514 *Immunol.* 2020 Jul 10;5(49):eabd1554. doi: 10.1126/sciimmunol.abd1554. PMID: 32651212;  
515 PMCID: PMC7402635.

516 Lei X, Dong X, Ma R, Wang W, Xiao X, Tian Z, Wang C, Wang Y, Li L, Ren L, Guo F, Zhao Z, Zhou Z,  
517 Xiang Z, Wang J. Activation and evasion of type I interferon responses by SARS-CoV-2. *Nat*  
518 *Commun.* 2020 Jul 30;11(1):3810. doi: 10.1038/s41467-020-17665-9. PMID: 32733001; PMCID:  
519 PMC7392898.

520 Li Y, Renner DM, Comar CE, Whelan JN, Reyes HM, Cardenas-Diaz FL, Truitt R, Tan LH, Dong B,  
521 Alysandratos KD, Huang J, Palmer JN, Adappa ND, Kohanski MA, Kotton DN, Silverman RH,  
522 Yang W, Morrissey E, Cohen NA, Weiss SR. SARS-CoV-2 induces double-stranded RNA-  
523 mediated innate immune responses in respiratory epithelial derived cells and cardiomyocytes.  
524 *bioRxiv [Preprint].* 2020 Sep 25:2020.09.24.312553. doi: 10.1101/2020.09.24.312553. PMID:  
525 32995797; PMCID: PMC7523129.

526 Lu, S., Ye, Q., Singh, D., Villa, E., Cleveland, D. W., & Corbett, K. D. (2020). The SARS-CoV-2  
527 Nucleocapsid phosphoprotein forms mutually exclusive condensates with RNA and the membrane-  
528 associated M protein. *bioRxiv* : the preprint server for biology, 2020.07.30.228023.  
529 <https://doi.org/10.1101/2020.07.30.228023>

530 Narayanan K, Huang C, Lokugamage K, Kamitani W, Ikegami T, Tseng CT, Makino S. Severe acute  
531 respiratory syndrome coronavirus nsp1 suppresses host gene expression, including that of type I  
532 interferon, in infected cells. *J Virol.* 2008 May;82(9):4471-9. doi: 10.1128/JVI.02472-07. Epub  
533 2008 Feb 27. PMID: 18305050; PMCID: PMC2293030.

534 Nemeroff ME, Barabino SM, Li Y, Keller W, Krug RM. Influenza virus NS1 protein interacts with the  
535 cellular 30 kDa subunit of CPSF and inhibits 3'end formation of cellular pre-mRNAs. *Mol Cell.*  
536 1998 Jun;1(7):991-1000. doi: 10.1016/s1097-2765(00)80099-4. PMID: 9651582.

537 Schubert K, Karousis ED, Jomaa A, Scaiola A, Echeverria B, Gurzeler LA, Leibundgut M, Thiel V,  
538 Mühlemann O, Ban N. SARS-CoV-2 Nsp1 binds the ribosomal mRNA channel to inhibit

539 translation. *Nat Struct Mol Biol.* 2020 Oct;27(10):959-966. doi: 10.1038/s41594-020-0511-8. Epub  
540 2020 Sep 9. Erratum in: *Nat Struct Mol Biol.* 2020 Nov;27(11):1094. PMID: 32908316.

541 Wilk AJ, Rustagi A, Zhao NQ, Roque J, Martínez-Colón GJ, McKechnie JL, Ivison GT, Ranganath T,  
542 Vergara R, Hollis T, Simpson LJ, Grant P, Subramanian A, Rogers AJ, Blish CA. A single-cell  
543 atlas of the peripheral immune response in patients with severe COVID-19. *Nat Med.* 2020  
544 Jul;26(7):1070-1076. doi: 10.1038/s41591-020-0944-y. Epub 2020 Jun 8. PMID: 32514174;  
545 PMCID: PMC7382903.

546 Zhang K, Miorin L, Makio T, Dehghan I, Gao S, Xie Y, Zhong H, Esparza M, Kehrer T, Kumar A, Hobman  
547 TC, Ptak C, Gao B, Minna JD, Chen Z, García-Sastre A, Ren Y, Wozniak RW, Fontoura BMA.  
548 Nsp1 protein of SARS-CoV-2 disrupts the mRNA export machinery to inhibit host gene  
549 expression. *Sci Adv.* 2021 Feb 5;7(6):eabe7386. doi: 10.1126/sciadv.abe7386. PMID: 33547084;  
550 PMCID: PMC7864571.

551 Zhou Z, Ren L, Zhang L, Zhong J, Xiao Y, Jia Z, Guo L, Yang J, Wang C, Jiang S, Yang D, Zhang G, Li  
552 H, Chen F, Xu Y, Chen M, Gao Z, Yang J, Dong J, Liu B, Zhang X, Wang W, He K, Jin Q, Li M,  
553 Wang J. Heightened Innate Immune Responses in the Respiratory Tract of COVID-19 Patients.  
554 *Cell Host Microbe.* 2020 Jun 10;27(6):883-890.e2. doi: 10.1016/j.chom.2020.04.017. Epub 2020  
555 May 4. PMID: 32407669; PMCID: PMC7196896.
